# Supplementary material for: Innovative COVID-19 point-of-care diagnostics suitable for tuberculosis diagnosis: a scoping review protocol
Source: PubMed Central journal article supplement — BMJ Open. 2023 Feb 8;13(2):e065194. doi: 10.1136/bmjopen-2022-065194 (PMC9922875; doi:10.1136/bmjopen-2022-065194), 2023-02-08

# BMJ Open

BMJ Open is committed to open peer review. As part of this commitment we make the peer review history of every article we publish publicly available.

When an article is published we post the peer reviewers' comments and the authors' responses online. We also post the versions of the paper that were used during peer review. These are the versions that the peer review comments apply to.

The versions of the paper that follow are the versions that were submitted during the peer review process. They are not the versions of record or the final published versions. They should not be cited or distributed as the published version of this manuscript.

BMJ Open is an open access journal and the full, final, typeset and author-corrected version of record of the manuscript is available on our site with no access controls, subscription charges or pay-per-view fees (<http://bmjopen.bmj.com>).

If you have any questions on BMJ Open's open peer review process please email [info.bmjopen@bmj.com](mailto:info.bmjopen@bmj.com)

# BMJ Open

## Innovative COVID-19 Point-of-Care Diagnostics Suitable for Tuberculosis Diagnosis: A Scoping Review Protocol

|                               |                                                                                                                                                                                                                                                                                                                                                                                                                                                                                                                                                                                                    |
|-------------------------------|----------------------------------------------------------------------------------------------------------------------------------------------------------------------------------------------------------------------------------------------------------------------------------------------------------------------------------------------------------------------------------------------------------------------------------------------------------------------------------------------------------------------------------------------------------------------------------------------------|
| Journal:                      | <i>BMJ Open</i>                                                                                                                                                                                                                                                                                                                                                                                                                                                                                                                                                                                    |
| Manuscript ID                 | bmjopen-2022-065194                                                                                                                                                                                                                                                                                                                                                                                                                                                                                                                                                                                |
| Article Type:                 | Protocol                                                                                                                                                                                                                                                                                                                                                                                                                                                                                                                                                                                           |
| Date Submitted by the Author: | 01-Jun-2022                                                                                                                                                                                                                                                                                                                                                                                                                                                                                                                                                                                        |
| Complete List of Authors:     | Yerlikaya, Seda; Heidelberg University, Division of Infectious Diseases and Tropical Medicine<br>Holtgrewe, Lydia; Yale University, Yale School of Public Health; Heidelberg University, Division of Infectious Diseases and Tropical Medicine<br>Broger, Tobias; Heidelberg University, Division of Infectious Diseases and Tropical Medicine<br>Isaacs, Chris; Connected Diagnostics Limited<br>Nahid, Payam; UCSF<br>Cattamanchi, A; UCSF, Division of Pulmonary and Critical Care Medicine<br>Denkinger, Claudia; Heidelberg University, Division of Infectious Diseases and Tropical Medicine |
| Keywords:                     | Tuberculosis < INFECTIOUS DISEASES, COVID-19, Diagnostic microbiology < INFECTIOUS DISEASES                                                                                                                                                                                                                                                                                                                                                                                                                                                                                                        |
|                               |                                                                                                                                                                                                                                                                                                                                                                                                                                                                                                                                                                                                    |

SCHOLARONE™  
Manuscripts

# Innovative COVID-19 Point-of-Care Diagnostics Suitable for Tuberculosis Diagnosis: A Scoping Review Protocol

Seda Yerlikaya<sup>1</sup> (*Corresponding author*: Division of Infectious Diseases and Tropical Medicine, Heidelberg University Hospital and Faculty of Medicine, Heidelberg University, Heidelberg, Germany, [seda.yerlikaya@uni-heidelberg.de](mailto:seda.yerlikaya@uni-heidelberg.de)), Lydia Holtgrewe<sup>1</sup>, Tobias Broger<sup>1</sup>, Chris Isaacs<sup>2</sup>, Payam Nahid<sup>3,4</sup>, Adithya Cattamanchi<sup>4</sup>, Claudia Denkinger<sup>1</sup>

<sup>1</sup>Division of Infectious Diseases and Tropical Medicine, Heidelberg University Hospital and Faculty of Medicine, Heidelberg University, Heidelberg, Germany.

<sup>2</sup>Connected Diagnostics Limited, London, UK.

<sup>3</sup>Division of HIV, Infectious Diseases and Global Medicine, University of California San Francisco, San Francisco, California, USA.

<sup>4</sup>Division of Pulmonary and Critical Care Medicine and Center for Tuberculosis, University of California San Francisco, San Francisco, California, USA.

## ABSTRACT

### Introduction

In 2014, the World Health Organization (WHO) published high-priority target product profiles (TPPs) for new tuberculosis (TB) diagnostics to align end-user needs with test targets and specifications; nevertheless, no TB test meets these targets to date. The COVID-19-driven momentum in the diagnostics world offers an opportunity to address the long-standing lack of innovation in the field of TB diagnostics. This scoping review aims to summarize point-of-care (POC) molecular and antigen tests for COVID-19 diagnosis that, when applied to TB, potentially meet WHO TPPs. This summary of currently available innovative diagnostic tools will guide the development of novel TB diagnostics toward the WHO-set targets.

### Methods and Analysis

We will follow the PRISMA extension Scoping Reviews (PRISMA-ScR) recommendations. MEDLINE (via PubMed), bioRxiv, MedRxiv, as well as other publicly available *in vitro* diagnostic test databases, will be searched. POC antigen or molecular tests developed for SARS-CoV-2 detection that meet the eligibility criteria will be included in the review. Developer description, test description, operation characteristics, pricing information, performance, and commercialization status of diagnostic tests identified will be extracted using a predefined standardized data extraction form. Two reviewers will independently perform the screening and data extraction. A narrative synthesis of the final data will be provided.

### Ethics and Dissemination

No ethical approval is required because individual patient data will not be included. The findings will be published in open-access scientific journals.

### Scoping review registration

This review protocol will not be registered with the International Prospective Register of Systematic Reviews (PROSPERO) because scoping reviews are not accepted.

## STRENGTHS AND LIMITATIONS OF THIS STUDY

- Our search strategy is based on a solid framework and involves multiple sources of information
- Technologies from a wide range of developers are identified by searching both literature and IVD medical device databases (academics, start-ups, large-scale IVD diagnostic companies)
- Two reviewers will independently work on the screening process
- Our search is focused on late-stage products that can be quickly adapted to TB (Web of Science and Embase are not searched) and IVD medical device database that are publicly available
- The data will be extracted by a single reviewer but will be reviewed by a second reviewer

## INTRODUCTION

### *Rationale*

Until COVID-19, tuberculosis (TB) was the leading single infectious cause of death in the world, responsible for approximately 10 million new cases and 1.5 million deaths each year, primarily among the most socioeconomically vulnerable.<sup>1</sup> Delayed and missed diagnosis is a major impediment to improving individual TB outcomes and control.<sup>2-4</sup> Every year, more than one-third of all TB cases go undiagnosed. This diagnostic gap has been further widened by COVID-19.<sup>1</sup> Sputum smear microscopy remains the predominant TB microbiological test, despite World Health Organization (WHO) recommendations for the adoption of rapid molecular testing for TB diagnosis.<sup>5,6</sup> The varying clinical sensitivity of smear microscopy, as well as the difficulties in obtaining sputum from patients and access to healthcare, are among the key contributors to missed TB diagnosis.<sup>7</sup>

The currently available point-of-care (POC) TB tests hold the promise of helping close the gap, but still fall short of meeting the WHO-defined target product profiles (TPPs) either due to low accuracy or limited operational suitability.<sup>8,9</sup> The GeneXpert Dx System (Cepheid, Sunnyvale, CA, USA), an integrated, single-use cartridge-based diagnostic system, has been the molecular diagnostic test of choice for TB since its market release in 2010.<sup>10</sup> The Xpert MTB/RIF (Xpert and Xpert MTB/RIF Ultra (Xpert Ultra) cartridges detect *M. tuberculosis* (MTB) DNA along with mutations associated with rifampicin resistance, with the latter being an improved version with increased sensitivity.<sup>9</sup> Despite its promise as a POC TB test, the system has considerable drawbacks, such as the need for continuous power, high maintenance and low operating temperatures, low specificity in individuals with a history of TB, and the use of sputum as the sample type. Truenat™ TB assays (Molbio Diagnostics, Bangalore, India) have lately emerged as a true POC alternative to the GeneXpert system, owing to its improved operational aspects; nonetheless, Truenat™ still relies on sputum.<sup>9,11,12</sup>

The only non-sputum TB tests on the market are Alere Determine™ TB LAM Ag test (Abbott, Chicago, IL, USA) and Fujifilm SILVAMP TB LAM assay (FujiFilm, Tokyo, Japan). Both tests are lateral flow assays (LFA) that detect lipoarabinomannan (LAM), a component of mycobacterial cell wall, in urine. They are best suited for use in resource-constrained settings due to their quick turnaround time (less than 30 minutes), instrument-free operation, and minimal training needs.<sup>12</sup> However, these rapid tests show reasonable performance only in specific populations (e.g., people living with HIV) and require a confirmatory test due to their suboptimal specificity.<sup>13,14</sup> The limit of detection (LoD) of a rapid, low-cost POC LAM detection test capable of detecting TB in all patient groups and meeting the WHO TPP

1  
2  
3 is estimated to be 5 pg/mL, compared to the current tests' LoD of >25 pg/mL<sup>15</sup>. As a result, instrument-  
4 based, high-sensitivity antigen detection systems are more likely than conventional LFAs to hit this  
5 target.  
6

7 The desire to gain a share of the COVID-19-generated diagnostic market drove developers to innovate  
8 and speed up their development pipelines over the last two years. As the market reaches saturation,  
9 developers are looking for new avenues to apply their innovations. TB would be a viable option for  
10 these developers, given the extremely high disease burden, supportive government initiatives, lower  
11 validation costs thanks to no-cost TB clinical platforms (e.g., R2D2 TB Network, FEND-TB), and  
12 economies of scale resulting from a large available market despite the low margin. It is critical to  
13 identify promising innovations early on and connect their developers with assay developers and other  
14 key stakeholders in order to capitalize on the COVID-19-driven momentum.  
15  
16  
17  
18  
19

### 20 **Objectives**

21 In this scoping review, we will summarize POC molecular and antigen tests for COVID-19 diagnosis with  
22 the potential of meeting the WHO TPPs for new TB diagnostics. This summary of currently available  
23 innovative diagnostic tools will aid the development of novel TB diagnostics to meet WHO TPP targets  
24 by informing developers, donors and also advocates.  
25  
26  
27

### 28 **METHODS**

#### 29 **Overview**

30 This is a scoping review of the scientific literature and COVID-19 test databases. This protocol follows  
31 the Preferred Reporting Items for Systematic Reviews and Meta-Analyses Protocols (PRISMA-P)  
32 guidelines<sup>16</sup>, and the methodological framework developed by Levac *et al.*<sup>17</sup> The final publication of  
33 this study will follow the PRISMA extension Scoping Reviews (PRISMA-ScR) recommendations.<sup>18</sup>  
34  
35  
36

37 In this review, we aim to address which innovative diagnostic tools developed for COVID-19, if  
38 successfully applied to TB, may fulfil the WHO TPPs of TB diagnostics for use in high TB burden settings.  
39 The focus will be on POC molecular and antigen tests.  
40  
41

#### 42 **Definitions**

43 For this work, we will follow the following definitions:

- 44 ● *Diagnostic test*: "a test that is used to determine, verify or confirm a patient's clinical condition  
45 as a sole determinant"<sup>19</sup>
- 46 ● *Point-of-care (POC) in vitro diagnostic (IVD) testing*: "testing that *can be* performed by a  
47 minimally trained healthcare professional near a patient and outside of central laboratory  
48 testing facilities and can result in an immediate decision for next steps of care"<sup>20</sup>
- 49 ● *TPPs*: "target product profiles that define high priority development targets for new tests,  
50 specifying performance and operational characteristics and the cost range of desired new  
51 tests"<sup>8</sup>

#### 52 **Eligibility Criteria**

53 We will include all POC antigen or molecular tests developed and used for SARS-CoV-2 detection that  
54 meet the inclusion criteria outlined below, which were adapted from the Cochrane review by Dinnes  
55 *et al.*<sup>21</sup>:  
56  
57  
58  
59  
60

- portable or easily transportable equipment for running and/or reading the assay (mains-/battery-powered);
- minimal sample preparation requirements (e.g., single-step mixing, no requirement for additional equipment or precise sample volume transfer unless a disposable automatic fill or graduated transfer device is used);
- minimal biosafety requirements (e.g., personal protective equipment (PPE), good ventilation, and a biohazard bag for waste disposal);
- no requirement for a temperature-controlled environment; and
- test results available within a single clinical encounter (less than two hours of sample collection)<sup>22</sup>.

We will include studies of all designs, as well as case reports, reviews, letters, and editorials, that use or report on a POC molecular or antigen test for SARS-CoV-2 detection.

We will exclude diagnostic tests that meet the following exclusion criteria:

- conventional lateral flow assay without any innovative features for improved performance,
- open system molecular assays; and
- tests that are currently in use for TB.

### **Information Sources**

We will search for peer-reviewed published scientific literature in PubMed/Medline, and pre-prints in bioRxiv and MedRxiv. In addition, the following sources will be searched:

- U.S. Food and Drug Administration (FDA) Tables of *In Vitro* Diagnostics Emergency Use Authorizations  
<https://www.fda.gov/medical-devices/coronavirus-disease-2019-covid-19-emergency-use-authorizations-medical-devices/in-vitro-diagnostics-euas>
- EUDAMED - European Database on Medical Devices  
<https://ec.europa.eu/tools/eudamed/#/screen/search-device>
- NMPA - China Medical Products Administration Database  
<https://udi.nmpa.gov.cn/>
- MFDS - Republic of Korea's Ministry of Food and Drug Safety (MFDS)  
[https://www.mfds.go.kr/eng/brd/m\\_41/list.do](https://www.mfds.go.kr/eng/brd/m_41/list.do)
- MDALL - Health Canada Medical Devices Active Licence Listing  
<https://health-products.canada.ca/mdall-limh/index-eng.jsp>
- CDSCO - Government of India, Central Drugs Standard Control Organization  
<https://cdsco.gov.in/opencms/opencms/en/Medical-Device-Diagnostics/InVitro-Diagnostics/>
- FIND, the Global Alliance for Diagnostics COVID-19 Test Directory  
<https://www.finddx.org/covid-19/test-directory/>
- Johns Hopkins Centre for Health Security Antigen and Molecular-based Tests Tracker  
<https://www.centerforhealthsecurity.org/covid-19TestingToolkit/molecular-based-tests/current-molecular-and-antigen-tests.html>
- National Institutes of Health (NIH) Rapid Acceleration of Diagnostics (RADx®)  
<https://www.nih.gov/research-training/medical-research-initiatives/radx>

### **Search Strategy**

The search term used is shown in Table 1. The search term will be adapted as necessary for the other databases. The medrxiv package in R (version 4.0.5; R Foundation for Statistical Computing) is used to search the bioRxiv and MedRxiv databases to overcome the limitations of the search functionality of these websites and allow for reproducibility.

Table 1. Search strategy.

| <b>PubMed/MEDLINE</b> (searched on 05 May 2022) |                                                                                                                                                                                                                                                                                                                                                                                                                                                                                                                                                                                                                                                                                                                                                                                                                                                                                                                                                                                   | <b>Items Found</b> |
|-------------------------------------------------|-----------------------------------------------------------------------------------------------------------------------------------------------------------------------------------------------------------------------------------------------------------------------------------------------------------------------------------------------------------------------------------------------------------------------------------------------------------------------------------------------------------------------------------------------------------------------------------------------------------------------------------------------------------------------------------------------------------------------------------------------------------------------------------------------------------------------------------------------------------------------------------------------------------------------------------------------------------------------------------|--------------------|
| Condition of Interest                           | "2019 nCoV"[Title/Abstract] OR "2019nCoV"[Title/Abstract] OR "2019 novel coronavirus"[Title/Abstract] OR "COVID-19"[Title/Abstract] OR "covid-19"[Title/Abstract] OR "COVID19"[Title/Abstract] OR "covid 19"[Title/Abstract] OR "new coronavirus"[Title/Abstract] OR "novel coronavirus"[Title/Abstract] OR "novel corona virus"[Title/Abstract] OR "sars cov 2"[Title/Abstract] OR "SARS-CoV-2"[Title/Abstract] OR "severe acute respiratory syndrome coronavirus 2"[Title/Abstract]                                                                                                                                                                                                                                                                                                                                                                                                                                                                                             | 239,080            |
| Type of Technology                              | "molecular"[Title/Abstract] OR "isothermal"[Title/Abstract] OR "PCR"[Title/Abstract] OR "polymerase chain reaction"[Title/Abstract] OR "LAMP"[Title/Abstract] OR "immunoassay"[Title/Abstract] OR "antigen"[Title/Abstract]                                                                                                                                                                                                                                                                                                                                                                                                                                                                                                                                                                                                                                                                                                                                                       | 2,662,104          |
| Intended Setting                                | "point of care"[All Fields] OR "POC"[All Fields] OR "near patient"[All Fields] OR "rapid test*"[All Fields] OR "bedside test*"[All Fields] OR "laboratory-independent"[All Fields]                                                                                                                                                                                                                                                                                                                                                                                                                                                                                                                                                                                                                                                                                                                                                                                                | 45,243             |
| Intended Use Case                               | "diagnos*"[Title/Abstract] OR "detect*"[Title/Abstract]                                                                                                                                                                                                                                                                                                                                                                                                                                                                                                                                                                                                                                                                                                                                                                                                                                                                                                                           | 4,996,433          |
| <b>Search Term</b>                              | ("2019 nCoV"[Title/Abstract] OR "2019nCoV"[Title/Abstract] OR "2019 novel coronavirus"[Title/Abstract] OR "COVID-19"[Title/Abstract] OR "covid-19"[Title/Abstract] OR "COVID19"[Title/Abstract] OR "covid 19"[Title/Abstract] OR "new coronavirus"[Title/Abstract] OR "novel coronavirus"[Title/Abstract] OR "novel corona virus"[Title/Abstract] OR "sars cov 2"[Title/Abstract] OR "SARS-CoV-2 "[Title/Abstract] OR "severe acute respiratory syndrome coronavirus 2"[Title/Abstract]) AND ("molecular"[Title/Abstract] OR "isothermal"[Title/Abstract] OR "PCR"[Title/Abstract] OR "polymerase chain reaction"[Title/Abstract] OR "LAMP"[Title/Abstract] OR "immunoassay"[Title/Abstract] OR "antigen"[Title/Abstract]) AND ("point of care"[All Fields] OR "POC"[All Fields] OR "near patient"[All Fields] OR "rapid test*"[All Fields] OR "bedside test*"[All Fields] OR "laboratory-independent"[All Fields]) AND ("diagnos*"[Title/Abstract] OR "detect*"[Title/Abstract]) | <b>1,161</b>       |
| <b>medRxiv</b> (searched on 04 May 2022)        |                                                                                                                                                                                                                                                                                                                                                                                                                                                                                                                                                                                                                                                                                                                                                                                                                                                                                                                                                                                   | <b>Items Found</b> |
| Condition of Interest                           | "2019 nCoV", "2019nCoV", "2019 novel coronavirus", "COVID-19", "covid-19", "COVID19", "covid 19", "new coronavirus", "novel coronavirus", "novel corona virus", "sars cov 2", "SARS-CoV-2", "severe acute respiratory syndrome coronavirus 2"                                                                                                                                                                                                                                                                                                                                                                                                                                                                                                                                                                                                                                                                                                                                     | 17,327             |



|                                          |                                                                                                                                                                                                                                                                                                                                                                                                                                                                                                                  |             |
|------------------------------------------|------------------------------------------------------------------------------------------------------------------------------------------------------------------------------------------------------------------------------------------------------------------------------------------------------------------------------------------------------------------------------------------------------------------------------------------------------------------------------------------------------------------|-------------|
| Type of Technology                       | "molecular", "isothermal", "PCR", "polymerase chain reaction", "LAMP", "immunoassay", "antigen"                                                                                                                                                                                                                                                                                                                                                                                                                  | 4,878       |
| Intended Setting                         | "point of care", "POC", "near patient", "rapid test*", "bedside test*", "laboratory-independent"                                                                                                                                                                                                                                                                                                                                                                                                                 | 282         |
| Intended Use Case                        | "diagnos", "detect"                                                                                                                                                                                                                                                                                                                                                                                                                                                                                              | 9,365       |
| Search Term                              | "2019 nCoV", "2019nCoV", "2019 novel coronavirus", "COVID-19", "covid-19", "COVID19", "covid 19", "new coronavirus", "novel coronavirus", "novel corona virus", "sars cov 2", "SARS-CoV-2", "severe acute respiratory syndrome coronavirus 2" ) AND ("molecular" OR "isothermal" OR "PCR" OR "polymerase chain reaction" OR "LAMP" OR "immunoassay" OR "antigen" ) AND ("point of care" OR "POC" OR "near patient" OR "rapid test*" OR "bedside test" OR "laboratory-independent" ) AND ("diagnos" OR "detect" ) | 158         |
| <b>bioRxiv</b> (searched on 04 May 2022) |                                                                                                                                                                                                                                                                                                                                                                                                                                                                                                                  | Items Found |
| Condition of Interest                    | "2019 nCoV", "2019nCoV", "2019 novel coronavirus", "COVID-19", "covid-19", "COVID19", "covid 19", "new coronavirus", "novel coronavirus", "novel corona virus", "sars cov 2", "SARS-CoV-2", "severe acute respiratory syndrome coronavirus 2"                                                                                                                                                                                                                                                                    | 5,759       |
| Type of Technology                       | "molecular", "isothermal", "PCR", "polymerase chain reaction", "LAMP", "immunoassay", "antigen"                                                                                                                                                                                                                                                                                                                                                                                                                  | 27,615      |
| Intended Setting                         | "point of care", "POC", "near patient", "rapid test*", "bedside test*", "laboratory-independent"                                                                                                                                                                                                                                                                                                                                                                                                                 | 185         |
| Intended Use Case                        | "diagnos", "detect"                                                                                                                                                                                                                                                                                                                                                                                                                                                                                              | 22,480      |
| Search Term                              | "2019 nCoV", "2019nCoV", "2019 novel coronavirus", "COVID-19", "covid-19", "COVID19", "covid 19", "new coronavirus", "novel coronavirus", "novel corona virus", "sars cov 2", "SARS-CoV-2", "severe acute respiratory syndrome coronavirus 2" ) AND ("molecular" OR "isothermal" OR "PCR" OR "polymerase chain reaction" OR "LAMP" OR "immunoassay" OR "antigen" ) AND ("point of care" OR "POC" OR "near patient" OR "rapid test*" OR "bedside test" OR "laboratory-independent" ) AND ("diagnos" OR "detect" ) | 8           |

### Study Records

All retrieved articles will be collated using the Covidence software and duplicates will be removed. The same software will be used for screening. Two reviewers will independently screen the titles and abstracts of the initial search results against the eligibility criteria. Following that, full-text screening will be performed by the same reviewers using standardized forms on Covidence. Any discrepancies that arise during the screening will be resolved through consensus or by a third reviewer.



### **Data Collection Process**

Covidence will also be used for data extraction. Developer description, test description, operation characteristics, pricing information, performance, and commercialization status will be extracted based on the predefined variables (Table 2). One reviewer will extract data from the selected reports, which will then be reviewed by a second reviewer. Any discrepancies will be resolved through consensus or by a third party. At this step, additional information sources, such as the developer's website or the developer contact person, will be reviewed for each test included in the review to acquire any missing or additional data on the test of interest.

Table 2. Data extraction strategy.

|                                  |                                                                                                                                                                                                                                                                                 |
|----------------------------------|---------------------------------------------------------------------------------------------------------------------------------------------------------------------------------------------------------------------------------------------------------------------------------|
| <b>Developer Description</b>     | Developer name, business type, website, country                                                                                                                                                                                                                                 |
| <b>Test Description</b>          | Product name, technology type, technology description, primary use case, target population, technology readiness/maturity level, target end user, target setting                                                                                                                |
| <b>Operation Characteristics</b> | Sample type, number of manual sample processing steps, biomarker target, multi-use platform, throughput capacity, time-to-result, hands-on-time, ease of use, infrastructure requirements, operating temperature, operating humidity level, shelf life, connectivity, biosafety |
| <b>Pricing</b>                   | Estimated price range per test, estimated price range per instrument                                                                                                                                                                                                            |
| <b>Performance</b>               | Limit of detection, diagnostic sensitivity, diagnostic specificity                                                                                                                                                                                                              |
| <b>Commercialization Status</b>  | Current regulatory status                                                                                                                                                                                                                                                       |

### **Risk of Bias in Individual Studies**

Risk of bias in individual studies will not be assessed because this is a scoping review aiming to summarize diagnostic innovations developed for COVID-19 diagnosis that could potentially meet the WHO TPPs and be deployed in LMICs for TB diagnosis.

### **Data Synthesis**

Given the scope of the study, only a narrative synthesis will be provided. Information will be presented in the text and tables to summarize and explain key characteristics of the tests included, in accordance with current recommendations for scoping reviews and evidence mapping.

### **Strengths**

Our study has several strengths. Our search strategy is based on a solid framework and will involve multiple sources of information. We hope to find technologies from a wide range of developers, from academics to start-ups to large-scale IVD diagnostic companies, by searching both literature and IVD medical device databases. Two reviewers will work independently on the screening process.

### **Limitations**

1  
2  
3 There are several limitations to our study. First, we will not attempt to search literature databases like  
4 Web of Science or Embase, preferring to focus on late-stage products that can be quickly adapted to  
5 TB. Second, we limited our search in IVD medical device databases to those that were publicly available  
6 and thus limited to high-income countries. This raises the possibility of a narrow focus on technologies  
7 developed in LMICs. We will try to address this by looking through databases from FIND and John  
8 Hopkins, which any developer from anywhere in the world can submit to. Finally, the data will be  
9 extracted by a single reviewer, but the extracted data will be reviewed by a second reviewer. **Ethics  
10 and Dissemination**

11  
12  
13  
14 This scoping review will not require ethical approval because it does not involve individual patient data  
15 and uses sources that are in the public domain. We intend to publish our findings in open access  
16 scientific journals.

#### 17 **Patient and Public Involvement**

18 No patients will be involved in the study's design, planning, or conception.

#### 19 **FUNDING STATEMENT**

20 This systematic review is funded by the National Institutes of Health (NIH) (funding reference number  
21 U01AI152087; Rapid Research in Diagnostics Development for Tuberculosis Network).

#### 22 **AUTHOR'S CONTRIBUTIONS**

23 S. Y. developed the scoping review protocol. L.H., T.B., C.I., P.N., A.C., and C.D. provided critical editing  
24 and review.

#### 25 **AUTHOR'S CONTACTS**

26 Seda Yerlikaya (Corresponding author): [seda.yerlikaya@uni-heidelberg.de](mailto:seda.yerlikaya@uni-heidelberg.de), Heidelberg University  
27 Hospital, Division of Infectious Diseases and Tropical Medicine, Im Neuenheimer Feld 324, 69120  
28 Heidelberg, Germany, +49(0) 6221- 56-35091

29 Lydia Holtgrewe: [lydia.holtgrewe@yale.edu](mailto:lydia.holtgrewe@yale.edu)

30 Tobias Broger: [tobias.broger@uni-heidelberg.de](mailto:tobias.broger@uni-heidelberg.de)

31 Chris Isaacs: [chris.isaacs@connected-dx.com](mailto:chris.isaacs@connected-dx.com)

32 Payam Nahid: [pnaid@ucsf.edu](mailto:pnaid@ucsf.edu)

33 Adithya Cattamanchi: [Adithya.Cattamanchi@ucsf.edu](mailto:Adithya.Cattamanchi@ucsf.edu)

34 Claudia Denkinger: [Claudia.Denkinger@uni-heidelberg.de](mailto:Claudia.Denkinger@uni-heidelberg.de)

#### 35 **COMPETING INTERESTS STATEMENT**

36 Authors declare no financial conflict of interest. T.B. holds patents in the fields of lipoarabinomannan  
37 detection and aerosol collection, and is a shareholder of Avelo Ltd, a Swiss diagnostics company. C.I. is  
38 the founder and director of Connected Diagnostics Limited, a UK-based commercial entity that assists  
39 companies with the development of diagnostic devices. C.D. is a member of the Scientific Advisory  
40 Committee of Avelo Ltd.

#### 41 **KEYWORDS**

Tuberculosis, COVID-19, Diagnostics, Point-of-care, Innovation

## WORD COUNT

2328

## REFERENCES

1. Global Tuberculosis Report 2021. <https://www.who.int/publications-detail-redirect/9789240037021> (2021).
2. Reid, M. J. A. *et al.* Building a tuberculosis-free world: The Lancet Commission on tuberculosis. *The Lancet* vol. 393 1331–1384 (2019).
3. Vesga, J. F. *et al.* Assessing tuberculosis control priorities in high-burden settings: a modelling approach. *The Lancet Global Health* vol. 7 e585–e595 (2019).
4. Chin, D. P. & Hanson, C. L. Finding the Missing Tuberculosis Patients. *The Journal of infectious diseases* vol. 216 S675–S678 (2017).
5. Nathavitharana, R. R., Jijon, D. F., Pal, P. & Rane, S. Diagnosing active tuberculosis in primary care. *BMJ* **374**, n1590 (2021).
6. WHO consolidated guidelines on tuberculosis. Module 3: Diagnosis - Rapid diagnostics for tuberculosis detection 2021 update. <https://www.who.int/publications-detail-redirect/9789240029415> (2021).
7. Steingart, K. R. *et al.* Fluorescence versus conventional sputum smear microscopy for tuberculosis: a systematic review. *Lancet Infect. Dis.* **6**, 570–581 (2006).
8. WHO High-priority target product profiles for new tuberculosis diagnostics. [http://www.who.int/tb/publications/tpp\\_report/en/](http://www.who.int/tb/publications/tpp_report/en/) (2014).
9. Chopra, K. K. & Singh, S. Tuberculosis: Newer diagnostic tests: Applications and limitations. *Indian J. Tuberc.* **67**, S86–S90 (2020).
10. Naidoo, K. & Dookie, N. Can the GeneXpert MTB/XDR deliver on the promise of expanded, near-patient tuberculosis drug-susceptibility testing? *Lancet Infect. Dis.* **0**, (2022).
11. Penn-Nicholson, A. *et al.* A prospective multicentre diagnostic accuracy study for the Truenat tuberculosis assays. *Eur. Respir. J.* (2021) doi:10.1183/13993003.00526-2021.
12. Branigan, D. *et al.* The Tuberculosis Diagnostics Pipeline Report: Advancing the Next Generation of Tools. 24 (2020).
13. Lateral flow urine lipoarabinomannan assay (LF-LAM) for the diagnosis of active tuberculosis in people living with HIV, 2019 Update. <https://www.who.int/publications-detail-redirect/9789241550604>.
14. Yin, X. *et al.* Diagnostic value of Lipoarabinomannan antigen for detecting Mycobacterium tuberculosis in adults and children with or without HIV infection. *J. Clin. Lab. Anal.* **n/a**, e24238.
15. Broger, T. *et al.* Diagnostic accuracy of 3 urine lipoarabinomannan tuberculosis assays in HIV-negative outpatients. *J. Clin. Invest.* **130**, 5756–5764 (2020).
16. Shamseer, L. *et al.* Preferred reporting items for systematic review and meta-analysis protocols (PRISMA-P) 2015: elaboration and explanation. *BMJ* **349**, g7647 (2015).

- 1  
2  
3 17. Levac, D., Colquhoun, H. & O'Brien, K. K. Scoping studies: advancing the methodology.  
4 *Implement. Sci.* **5**, 69 (2010).  
5  
6 18. C. Tricco, A. *et al.* PRISMA Extension for Scoping Reviews (PRISMA-ScR): Checklist and  
7 Explanation. *Ann. Intern. Med.* (2018) doi:10.7326/M18-0850.  
8  
9 19. The selection and use of essential in vitro diagnostics - TRS 1031.  
10 <https://www.who.int/publications-detail-redirect/9789240019102>.  
11  
12 20. World Health Organization. *In vitro diagnostic medical devices (IVDs) used for the detection*  
13 *of high-risk human papillomavirus (HPV) genotypes in cervical cancer screening.* (World Health  
14 Organization, 2018).  
15  
16 21. Dinnes, J. *et al.* Rapid, point-of-care antigen and molecular-based tests for diagnosis of  
17 SARS-CoV-2 infection. *Cochrane Database Syst. Rev.* **2020**, CD013705 (2020).  
18  
19 22. Pai, N. P., Vadnais, C., Denkinger, C., Engel, N. & Pai, M. Point-of-care testing for infectious  
20 diseases: diversity, complexity, and barriers in low- and middle-income countries. *PLoS Med* **9**,  
21 e1001306 (2012).  
22  
23  
24  
25  
26  
27  
28  
29  
30  
31  
32  
33  
34  
35  
36  
37  
38  
39  
40  
41  
42  
43  
44  
45  
46  
47  
48  
49  
50  
51  
52  
53  
54  
55  
56  
57  
58  
59  
60

# BMJ Open

## Innovative COVID-19 Point-of-Care Diagnostics Suitable for Tuberculosis Diagnosis: A Scoping Review Protocol

|                                 |                                                                                                                                                                                                                                                                                                                                                                                                                                                                                                                                                                                                    |
|---------------------------------|----------------------------------------------------------------------------------------------------------------------------------------------------------------------------------------------------------------------------------------------------------------------------------------------------------------------------------------------------------------------------------------------------------------------------------------------------------------------------------------------------------------------------------------------------------------------------------------------------|
| Journal:                        | <i>BMJ Open</i>                                                                                                                                                                                                                                                                                                                                                                                                                                                                                                                                                                                    |
| Manuscript ID                   | bmjopen-2022-065194.R1                                                                                                                                                                                                                                                                                                                                                                                                                                                                                                                                                                             |
| Article Type:                   | Protocol                                                                                                                                                                                                                                                                                                                                                                                                                                                                                                                                                                                           |
| Date Submitted by the Author:   | 30-Nov-2022                                                                                                                                                                                                                                                                                                                                                                                                                                                                                                                                                                                        |
| Complete List of Authors:       | Yerlikaya, Seda; Heidelberg University, Division of Infectious Diseases and Tropical Medicine<br>Holtgrewe, Lydia; Yale University, Yale School of Public Health; Heidelberg University, Division of Infectious Diseases and Tropical Medicine<br>Broger, Tobias; Heidelberg University, Division of Infectious Diseases and Tropical Medicine<br>Isaacs, Chris; Connected Diagnostics Limited<br>Nahid, Payam; UCSF<br>Cattamanchi, A; UCSF, Division of Pulmonary and Critical Care Medicine<br>Denkinger, Claudia; Heidelberg University, Division of Infectious Diseases and Tropical Medicine |
| <b>Primary Subject Heading</b>: | Infectious diseases                                                                                                                                                                                                                                                                                                                                                                                                                                                                                                                                                                                |
| Secondary Subject Heading:      | Global health, Public health, Respiratory medicine                                                                                                                                                                                                                                                                                                                                                                                                                                                                                                                                                 |
| Keywords:                       | Tuberculosis < INFECTIOUS DISEASES, COVID-19, Diagnostic microbiology < INFECTIOUS DISEASES                                                                                                                                                                                                                                                                                                                                                                                                                                                                                                        |
|                                 |                                                                                                                                                                                                                                                                                                                                                                                                                                                                                                                                                                                                    |

SCHOLARONE™  
Manuscripts

# Innovative COVID-19 Point-of-Care Diagnostics Suitable for Tuberculosis Diagnosis: A Scoping Review Protocol

Seda Yerlikaya<sup>1\*</sup>, Lydia Holtgrewe<sup>1</sup>, Tobias Broger<sup>1</sup>, Chris Isaacs<sup>2</sup>, Payam Nahid<sup>3</sup>, Adithya Cattamanchi<sup>3</sup>, Claudia Denking<sup>1</sup>

<sup>1</sup>Division of Infectious Diseases and Tropical Medicine, Heidelberg University Hospital and Faculty of Medicine, Heidelberg University, Heidelberg, Germany.

<sup>2</sup>Connected Diagnostics Limited, London, UK.

<sup>3</sup>Division of Pulmonary and Critical Care Medicine and Center for Tuberculosis, University of California San Francisco, San Francisco, California, USA.

\* Corresponding author: [seda.yerlikaya@uni-heidelberg.de](mailto:seda.yerlikaya@uni-heidelberg.de)

## ABSTRACT

### Introduction

In 2014, the World Health Organization (WHO) published high-priority target product profiles (TPPs) for new tuberculosis (TB) diagnostics to align end-user needs with test targets and specifications; nevertheless, no TB test meets these targets to date. The COVID-19-driven momentum in the diagnostics world offers an opportunity to address the long-standing lack of innovation in the field of TB diagnostics. This scoping review aims to summarize point-of-care (POC) molecular and antigen tests for COVID-19 diagnosis that, when applied to TB, potentially meet WHO TPPs. This summary of currently available innovative diagnostic tools will guide the development of novel TB diagnostics toward the WHO-set targets.

### Methods and Analysis

We will follow the PRISMA extension Scoping Reviews (PRISMA-ScR) recommendations. MEDLINE (via PubMed), bioRxiv, MedRxiv, as well as other publicly available *in vitro* diagnostic test databases were searched on 23 November 2022. POC antigen or molecular tests developed for SARS-CoV-2 detection that meet the eligibility criteria will be included in the review. Developer description, test description, operation characteristics, pricing information, performance, and commercialization status of diagnostic tests identified will be extracted using a predefined standardized data extraction form. Two reviewers will independently perform the screening and data extraction. A narrative synthesis of the final data will be provided.

### Ethics and Dissemination

No ethical approval is required because individual patient data will not be included. The findings will be published in open-access scientific journals.

### Scoping review registration

This review protocol will not be registered with the International Prospective Register of Systematic Reviews (PROSPERO) because scoping reviews are not accepted.

## STRENGTHS AND LIMITATIONS OF THIS STUDY

- Our search strategy is based on a solid framework and involves multiple sources of information
- Technologies from a wide range of developers are identified by searching both literature and IVD medical device databases (academics, start-ups, large-scale IVD diagnostic companies)
- Two reviewers will independently work on the screening process
- Our search is focused on late-stage products that can be quickly adapted to TB (Web of Science and Embase are not searched) and IVD medical device database that are publicly available
- The data will be extracted by a single reviewer but will be reviewed by a second reviewer

## INTRODUCTION

### *Rationale*

Until COVID-19, tuberculosis (TB) was the leading single infectious cause of death in the world, responsible for approximately 10 million new cases and 1.5 million deaths each year, primarily among the most socioeconomically vulnerable.<sup>1</sup> Delayed and missed diagnosis is a major impediment to improving individual TB outcomes and control.<sup>2–4</sup> Every year, more than one-third of all TB cases go undiagnosed. This diagnostic gap has been further widened by COVID-19.<sup>1</sup> Sputum smear microscopy remains the predominant TB microbiological test, despite World Health Organization (WHO) recommendations for the adoption of rapid molecular testing for TB diagnosis.<sup>5,6</sup> The varying clinical sensitivity of smear microscopy, as well as the difficulties in obtaining sputum from patients and access to healthcare, are among the key contributors to missed TB diagnosis.<sup>7</sup>

In 2014, WHO defined four target product profiles (TPP) that were deemed of high priority: a point-of-care (POC) non-sputum-based biomarker test, a POC triage test, a POC smear microscopy replacement, and a rapid drug-susceptibility test<sup>8</sup>. The TPPs were designed to guide developers towards fit-for-purpose TB diagnostics in terms of test performance and operational characteristics. The currently available TB tests hold the promise of helping close the TB diagnostic gap, but still fall short of meeting the TPPs either due to low accuracy or limited operational suitability.<sup>8,9</sup>

The GeneXpert Dx System (Cepheid, Sunnyvale, CA, USA), an integrated, single-use cartridge-based diagnostic system, has been the molecular diagnostic test of choice for TB since its market release in 2010.<sup>10</sup> The Xpert MTB/RIF (Xpert and Xpert MTB/RIF Ultra (Xpert Ultra) cartridges detect *M. tuberculosis* (MTB) DNA along with mutations associated with rifampicin resistance, with the latter being an improved version with increased sensitivity.<sup>9</sup> Despite its promise as a POC TB test, the system has considerable drawbacks, such as the need for continuous power, high maintenance and low operating temperatures, low specificity in individuals with a history of TB, and the use of sputum as the sample type. Truenat™ TB assays (Molbio Diagnostics, Bangalore, India) have lately emerged as a true POC alternative to the GeneXpert system, owing to its improved operational aspects; nonetheless, Truenat™ still relies on sputum.<sup>9,11,12</sup>

The only non-sputum TB tests on the market are Alere Determine™ TB LAM Ag test (Abbott, Chicago, IL, USA) and Fujifilm SILVAMP TB LAM assay (FujiFilm, Tokyo, Japan). Both tests are lateral flow assays (LFA) that detect lipoarabinomannan (LAM), a component of mycobacterial cell wall, in urine. They are best suited for use in resource-constrained settings due to their quick turnaround time (less than 30 minutes), instrument-free operation, and minimal training needs.<sup>12</sup> However, these rapid tests show reasonable performance only in specific populations (e.g., people living with HIV) and require a confirmatory test due to their suboptimal specificity.<sup>13,14</sup> The limit of detection (LoD) of a rapid, low-



1  
2  
3 cost POC LAM detection test capable of detecting TB in all patient groups and meeting the WHO TPP  
4 is estimated to be 5 pg/mL, compared to the current tests' LoD of >25 pg/mL<sup>15</sup>. As a result, instrument-  
5 based, high-sensitivity antigen detection systems are more likely than conventional LFAs to hit this  
6 target.  
7

8  
9 The desire to gain a share of the COVID-19-generated diagnostic market drove developers to innovate  
10 and speed up their development pipelines over the last two years. As the market reaches saturation,  
11 developers are looking for new avenues to apply their innovations. TB would be a viable option for  
12 these developers, given the extremely high disease burden, supportive government initiatives, lower  
13 validation costs thanks to no-cost TB clinical platforms (e.g., R2D2 TB Network, FEND-TB), and  
14 economies of scale resulting from a large available market despite the low margin. It is critical to  
15 identify promising innovations early on and connect their developers with assay developers and other  
16 key stakeholders in order to capitalize on the COVID-19-driven momentum.  
17  
18

### 19 **Objectives**

20  
21 In this scoping review, we will summarize POC molecular and antigen tests for COVID-19 diagnosis with  
22 the potential of meeting the WHO TPPs for new TB diagnostics. This summary of currently available  
23 innovative diagnostic tools will aid the development of novel TB diagnostics to meet WHO TPP targets  
24 by informing developers, funders of TB diagnostic tools and also advocates for access to TB diagnostic  
25 testing.  
26  
27

### 28 **METHODS**

#### 29 **Overview**

30  
31 This is a scoping review of the scientific literature and COVID-19 test databases. This protocol follows  
32 the Preferred Reporting Items for Systematic Reviews and Meta-Analyses Protocols (PRISMA-P)  
33 guidelines<sup>16</sup>, and the methodological framework developed by Levac *et al.*<sup>17</sup> The final publication of  
34 this study will follow the PRISMA extension Scoping Reviews (PRISMA-ScR) recommendations.<sup>18</sup>  
35  
36

37  
38 In this review, we aim to address which innovative diagnostic tools developed for COVID-19, if  
39 successfully applied to TB, may fulfil the WHO TPPs of TB diagnostics for use in high TB burden settings.  
40 The focus will be on POC molecular and antigen tests.  
41  
42

#### 43 **Definitions**

44 For this work, we will follow the following definitions:

- 45  
46 ● *Diagnostic test*: “a test that is used to determine, verify or confirm a patient’s clinical condition  
47 as a sole determinant”<sup>19</sup>
- 48  
49 ● *Point-of-care (POC) in vitro diagnostic (IVD) testing*: “testing that *can be* performed by a lay  
50 user or a minimally trained healthcare professional at home and/or near a patient and outside  
51 of central laboratory testing facilities and can result in an immediate decision for next steps of  
52 care”<sup>20</sup>
- 53  
54 ● *TPPs*: “target product profiles that define high priority development targets for new tests,  
55 specifying performance and operational characteristics and the cost range of desired new  
56 tests”<sup>8</sup>  
57

#### 58 **Eligibility Criteria**

We will include all POC antigen or molecular tests developed and used for SARS-CoV-2 detection that meet the inclusion criteria outlined below, which were adapted from the Cochrane review by Dinnes *et al.*<sup>21</sup>:

- portable or easily transportable equipment for running and/or reading the assay (mains-/battery-powered);
- minimal sample preparation requirements (e.g., single-step mixing, no requirement for additional equipment or precise sample volume transfer unless a disposable automatic fill or graduated transfer device is used);
- minimal biosafety requirements (e.g., personal protective equipment (PPE), good ventilation, and a biohazard bag for waste disposal);
- no requirement for a temperature-controlled environment; and
- test results available within a single clinical encounter (less than two hours of sample collection)<sup>22</sup>.

We will include studies of all designs, as well as case reports, reviews, letters, and editorials, that use or report on a POC molecular or antigen test for SARS-CoV-2 detection. No restrictions on language or date will be applied. Translations will be carried out using Google Translate or DeepL as necessary. We will exclude diagnostic tests that meet the following exclusion criteria:

- conventional lateral flow assay without any innovative features for improved performance,
- open system molecular assays; and
- tests that are currently in use for TB.

### **Information Sources**

We will search for peer-reviewed published scientific literature in PubMed/Medline, and pre-prints in bioRxiv and MedRxiv. In addition, the following sources will be searched:

- U.S. Food and Drug Administration (FDA) Tables of *In Vitro* Diagnostics Emergency Use Authorizations  
<https://www.fda.gov/medical-devices/coronavirus-disease-2019-covid-19-emergency-use-authorizations-medical-devices/in-vitro-diagnostics-euas>
- EUDAMED - European Database on Medical Devices  
<https://ec.europa.eu/tools/eudamed/#/screen/search-device>
- NMPA - China Medical Products Administration Database  
<https://udi.nmpa.gov.cn/>
- MFDS - Republic of Korea's Ministry of Food and Drug Safety (MFDS)  
[https://www.mfds.go.kr/eng/brd/m\\_41/list.do](https://www.mfds.go.kr/eng/brd/m_41/list.do)
- MDALL - Health Canada Medical Devices Active Licence Listing  
<https://health-products.canada.ca/mdall-limh/index-eng.jsp>
- CDSCO - Government of India, Central Drugs Standard Control Organization  
<https://cdsco.gov.in/opencms/opencms/en/Medical-Device-Diagnostics/InVitro-Diagnostics/>
- FIND, the Global Alliance for Diagnostics COVID-19 Test Directory  
<https://www.finddx.org/covid-19/test-directory/>
- Johns Hopkins Centre for Health Security Antigen and Molecular-based Tests Tracker  
<https://www.centerforhealthsecurity.org/covid-19TestingToolkit/molecular-based-tests/current-molecular-and-antigen-tests.html>

- National Institutes of Health (NIH) Rapid Acceleration of Diagnostics (RADx®)  
<https://www.nih.gov/research-training/medical-research-initiatives/radx>

### Search Strategy

The search term used is shown in Table 1. The search term will be adapted as necessary for the other databases. The medrxiv package in R (version 4.0.5; R Foundation for Statistical Computing) is used to search the bioRxiv and MedRxiv databases to overcome the limitations of the search functionality of these websites and allow for reproducibility.

Table 1. Search strategy.

| PubMed/MEDLINE (searched on 23 November 2022) |                                                                                                                                                                                                                                                                                                                                                                                                                                                                                                                                                                                                                                                                                                                                                                                                                                                                                                                                                                                                                                                                   | Items Found |
|-----------------------------------------------|-------------------------------------------------------------------------------------------------------------------------------------------------------------------------------------------------------------------------------------------------------------------------------------------------------------------------------------------------------------------------------------------------------------------------------------------------------------------------------------------------------------------------------------------------------------------------------------------------------------------------------------------------------------------------------------------------------------------------------------------------------------------------------------------------------------------------------------------------------------------------------------------------------------------------------------------------------------------------------------------------------------------------------------------------------------------|-------------|
| Condition of Interest                         | "2019 nCoV"[Title/Abstract] OR "2019nCoV"[Title/Abstract] OR "2019 novel coronavirus"[Title/Abstract] OR "COVID-19"[Title/Abstract] OR "covid-19"[Title/Abstract] OR "COVID19"[Title/Abstract] OR "covid 19"[Title/Abstract] OR "new coronavirus"[Title/Abstract] OR "novel coronavirus"[Title/Abstract] OR "novel corona virus"[Title/Abstract] OR "sars cov 2"[Title/Abstract] OR "SARS-CoV-2"[Title/Abstract] OR "severe acute respiratory syndrome coronavirus 2"[Title/Abstract]                                                                                                                                                                                                                                                                                                                                                                                                                                                                                                                                                                             | 298,019     |
| Type of Technology                            | "molecular"[Title/Abstract] OR "isothermal"[Title/Abstract] OR "PCR"[Title/Abstract] OR "polymerase chain reaction"[Title/Abstract] OR "LAMP"[Title/Abstract] OR "CRISPR" [Title/Abstract] OR "immunoassay"[Title/Abstract] OR "antigen"[Title/Abstract]                                                                                                                                                                                                                                                                                                                                                                                                                                                                                                                                                                                                                                                                                                                                                                                                          | 2,781,618   |
| Intended Setting                              | "point of care"[All Fields] OR "POC"[All Fields] OR "near patient"[All Fields] OR "rapid test*"[All Fields] OR "bedside test*"[All Fields] OR "laboratory-independent"[All Fields] OR "point-of-care"[All Fields] OR "POCT"[All Fields] OR "portable"[All Fields]                                                                                                                                                                                                                                                                                                                                                                                                                                                                                                                                                                                                                                                                                                                                                                                                 | 83,363      |
| Intended Use Case                             | "diagnos*"[Title/Abstract] OR "detect*"[Title/Abstract]                                                                                                                                                                                                                                                                                                                                                                                                                                                                                                                                                                                                                                                                                                                                                                                                                                                                                                                                                                                                           | 5,169,560   |
| Search Term                                   | ("2019 nCoV"[Title/Abstract] OR "2019nCoV"[Title/Abstract] OR "2019 novel coronavirus"[Title/Abstract] OR "COVID-19"[Title/Abstract] OR "covid-19"[Title/Abstract] OR "COVID19"[Title/Abstract] OR "covid 19"[Title/Abstract] OR "new coronavirus"[Title/Abstract] OR "novel coronavirus"[Title/Abstract] OR "novel corona virus"[Title/Abstract] OR "sars cov 2"[Title/Abstract] OR " SARS-CoV-2 "[Title/Abstract] OR "severe acute respiratory syndrome coronavirus 2"[Title/Abstract]) AND ("molecular"[Title/Abstract] OR "isothermal"[Title/Abstract] OR "PCR"[Title/Abstract] OR "polymerase chain reaction"[Title/Abstract] OR "LAMP"[Title/Abstract] OR "immunoassay"[Title/Abstract] OR "antigen"[Title/Abstract]) AND ("point of care"[All Fields] OR "POC"[All Fields] OR "near patient"[All Fields] OR "rapid test*"[All Fields] OR "bedside test*"[All Fields] OR "laboratory-independent"[All Fields] OR "point-of-care"[All Fields] OR "POCT"[All Fields] OR "portable"[All Fields]) AND ("diagnos*"[Title/Abstract] OR "detect*"[Title/Abstract]) | 1,646       |

| <b>medRxiv</b> (searched on 23 Nov 2022) |                                                                                                                                                                                                                                                                                                                                                                                                                                                                                                                                                                                                | Items Found |
|------------------------------------------|------------------------------------------------------------------------------------------------------------------------------------------------------------------------------------------------------------------------------------------------------------------------------------------------------------------------------------------------------------------------------------------------------------------------------------------------------------------------------------------------------------------------------------------------------------------------------------------------|-------------|
| Condition of Interest                    | "2019 nCoV", "2019nCoV", "2019 novel coronavirus", "COVID-19", "covid-19", "COVID19", "covid 19", "new coronavirus", "novel coronavirus", "novel corona virus", "sars cov 2", "SARS-CoV-2", "severe acute respiratory syndrome coronavirus 2"                                                                                                                                                                                                                                                                                                                                                  | 18,990      |
| Type of Technology                       | "molecular", "isothermal", "PCR", "polymerase chain reaction", "LAMP", "immunoassay", "antigen", "CRISPR"                                                                                                                                                                                                                                                                                                                                                                                                                                                                                      | 5,547       |
| Intended Setting                         | "point of care", "POC", "near patient", "rapid test*", "bedside test*", "laboratory-independent", "point-of-care", "POCT", "portable"                                                                                                                                                                                                                                                                                                                                                                                                                                                          | 657         |
| Intended Use Case                        | "diagnos", "detect"                                                                                                                                                                                                                                                                                                                                                                                                                                                                                                                                                                            | 10,915      |
| <b>Search Term</b>                       | "2019 nCoV" OR "2019nCoV" OR "2019 novel coronavirus" OR "COVID-19" OR "covid-19" OR "COVID19" OR "covid 19" OR "new coronavirus" OR "novel coronavirus" OR "novel corona virus" OR "sars cov 2" OR "SARS-CoV-2" OR "severe acute respiratory syndrome coronavirus 2" ) AND ("molecular" OR "isothermal" OR "PCR" OR "polymerase chain reaction" OR "LAMP" OR "immunoassay" OR "antigen" OR "CRISPR") AND ("point of care" OR "POC" OR "near patient" OR "rapid test*" OR "bedside test" OR "laboratory-independent" OR "point-of-care" OR "POCT" OR "portable" ) AND ("diagnos" OR "detect" ) | <b>275</b>  |
| <b>bioRxiv</b> (searched on 23 Nov 2022) |                                                                                                                                                                                                                                                                                                                                                                                                                                                                                                                                                                                                | Items Found |
| Condition of Interest                    | "2019 nCoV", "2019nCoV", "2019 novel coronavirus", "COVID-19", "covid-19", "COVID19", "covid 19", "new coronavirus", "novel coronavirus", "novel corona virus", "sars cov 2", "SARS-CoV-2", "severe acute respiratory syndrome coronavirus 2"                                                                                                                                                                                                                                                                                                                                                  | 6,498       |
| Type of Technology                       | "molecular", "isothermal", "PCR", "polymerase chain reaction", "LAMP", "immunoassay", "antigen"                                                                                                                                                                                                                                                                                                                                                                                                                                                                                                | 34,925      |
| Intended Setting                         | "point of care", "POC", "near patient", "rapid test*", "bedside test*", "laboratory-independent", "point-of-care", "POCT", "portable"                                                                                                                                                                                                                                                                                                                                                                                                                                                          | 652         |
| Intended Use Case                        | "diagnos", "detect"                                                                                                                                                                                                                                                                                                                                                                                                                                                                                                                                                                            | 25,150      |
| <b>Search Term</b>                       | "2019 nCoV" OR "2019nCoV" OR "2019 novel coronavirus" OR "COVID-19" OR "covid-19" OR "COVID19" OR "covid 19" OR "new coronavirus" OR "novel coronavirus" OR "novel corona virus" OR "sars cov 2" OR "SARS-CoV-2" OR "severe acute respiratory syndrome coronavirus 2" ) AND ("molecular" OR "isothermal" OR "PCR" OR "polymerase chain reaction" OR "LAMP" OR "immunoassay" OR "antigen" ) AND ("point of care" OR "POC" OR "near patient" OR "rapid test*" OR "bedside test"                                                                                                                  | 33          |

|  |                                                                                                      |  |
|--|------------------------------------------------------------------------------------------------------|--|
|  | OR "laboratory-independent" OR "point-of-care" OR "POCT" OR "portable") AND ("diagnos" OR "detect" ) |  |
|--|------------------------------------------------------------------------------------------------------|--|

### **Study Records**

All retrieved articles will be collated using the Covidence software and duplicates will be removed. The same software will be used for screening. Two reviewers will independently screen the titles and abstracts of the initial search results against the eligibility criteria. Following that, full-text screening will be performed by the same reviewers using standardized forms on Covidence. Any discrepancies that arise during the screening will be resolved through consensus or by a third reviewer.

### **Data Collection Process**

Covidence will also be used for data extraction. Developer description, test description, operation characteristics, pricing information, performance, and commercialization status will be extracted based on the predefined variables (Table 2). One reviewer will extract data from the selected reports, which will then be reviewed by a second reviewer. Any discrepancies will be resolved through consensus or by a third party. At this step, additional information sources, such as the developer's website or the developer contact person, will be reviewed for each test included in the review to acquire any missing or additional data on the test of interest.

Table 2. Data extraction strategy.

|                                  |                                                                                                                                                                                                                                                                                 |
|----------------------------------|---------------------------------------------------------------------------------------------------------------------------------------------------------------------------------------------------------------------------------------------------------------------------------|
| <b>Developer Description</b>     | Developer name, business type, website, country                                                                                                                                                                                                                                 |
| <b>Test Description</b>          | Product name, technology type, technology description, primary use case, target population, technology readiness/maturity level, target end user, target setting                                                                                                                |
| <b>Operation Characteristics</b> | Sample type, number of manual sample processing steps, biomarker target, multi-use platform, throughput capacity, time-to-result, hands-on-time, ease of use, infrastructure requirements, operating temperature, operating humidity level, shelf life, connectivity, biosafety |
| <b>Pricing</b>                   | Estimated price range per test, estimated price range per instrument                                                                                                                                                                                                            |
| <b>Performance</b>               | Limit of detection, diagnostic sensitivity, diagnostic specificity                                                                                                                                                                                                              |
| <b>Commercialization Status</b>  | Current regulatory status                                                                                                                                                                                                                                                       |

### **Risk of Bias in Individual Studies**

Risk of bias in individual studies will not be assessed because this is a scoping review aiming to summarize diagnostic innovations developed for COVID-19 diagnosis that could potentially meet the WHO TPPs and be deployed in LMICs for TB diagnosis.

### **Data Synthesis**

1  
2  
3 Given the scope of the study, only a narrative synthesis will be provided. Information will be presented  
4 in the text and tables to summarize and explain key characteristics of the tests included, in accordance  
5 with current recommendations for scoping reviews and evidence mapping.  
6

### 7 **Study Status**

8  
9 The literature searches were run on 23 November 2022, as outlined above. The two reviewers are  
10 currently performing screening in line with the protocol. We plan to finalize the study by July 2023 for  
11 publication.  
12

### 13 **Strengths**

14  
15 Our study has several strengths. Our search strategy is based on a solid framework and will involve  
16 multiple sources of information. We hope to find technologies from a wide range of developers, from  
17 academics to start-ups to large-scale IVD diagnostic companies, by searching both literature and IVD  
18 medical device databases. Two reviewers will work independently on the screening process.  
19  
20

### 21 **Limitations**

22  
23 There are several limitations to our study. First, we will not attempt to search literature databases like  
24 Web of Science or Embase, preferring to focus on late-stage products that can be quickly adapted to  
25 TB. Second, we limited our search in IVD medical device databases to those that were publicly available  
26 and thus limited to high-income countries. This raises the possibility of a narrow focus on technologies  
27 developed in LMICs. We will try to address this by looking through databases from FIND and John  
28 Hopkins, which any developer from anywhere in the world can submit to. Finally, the data will be  
29 extracted by a single reviewer, but the extracted data will be reviewed by a second reviewer. **Ethics**  
30  
31

### 32 **and Dissemination**

33  
34 This scoping review will not require ethical approval because it does not involve individual patient data  
35 and uses sources that are in the public domain. We intend to publish our findings in open access  
36 scientific journals.  
37

### 38 **Patient and Public Involvement**

39  
40 No patients will be involved in the study's design, planning, or conception.  
41

### 42 **FUNDING STATEMENT**

43  
44 This systematic review is funded by the National Institutes of Health (NIH) (funding reference number  
45 U01AI152087; Rapid Research in Diagnostics Development for Tuberculosis Network).  
46

### 47 **AUTHOR'S CONTRIBUTIONS**

48  
49 S. Y. developed the scoping review protocol. L.H., T.B., C.I., P.N., A.C., and C.D. provided critical editing  
50 and review.  
51

### 52 **AUTHOR'S CONTACTS**

53  
54 Seda Yerlikaya (Corresponding author): [seda.yerlikaya@uni-heidelberg.de](mailto:seda.yerlikaya@uni-heidelberg.de), Heidelberg University  
55 Hospital, Division of Infectious Diseases and Tropical Medicine, Im Neuenheimer Feld 324, 69120  
56 Heidelberg, Germany, +49(0) 6221- 56-35091  
57

58  
59 Lydia Holtgrewe: [lydia.holtgrewe@yale.edu](mailto:lydia.holtgrewe@yale.edu)  
60

1  
2  
3 Tobias Broger: [tobias.broger@uni-heidelberg.de](mailto:tobias.broger@uni-heidelberg.de)

4  
5 Chris Isaacs: [chris.isaacs@connected-dx.com](mailto:chris.isaacs@connected-dx.com)

6  
7 Payam Nahid: [pnahid@ucsf.edu](mailto:pnahid@ucsf.edu)

8  
9 Adithya Cattamanchi: [Adithya.Cattamanchi@ucsf.edu](mailto:Adithya.Cattamanchi@ucsf.edu)

10  
11 Claudia Denking: [Claudia.Denking@uni-heidelberg.de](mailto:Claudia.Denking@uni-heidelberg.de)

## 12 13 **COMPETING INTERESTS STATEMENT**

14  
15 Authors declare no financial conflict of interest. T.B. holds patents in the fields of lipoarabinomannan  
16 detection and aerosol collection, and is a shareholder of Avelo Ltd, a Swiss diagnostics company. C.I. is  
17 the founder and director of Connected Diagnostics Limited, a UK-based commercial entity that assists  
18 companies with the development of diagnostic devices. C.D. is a member of the Scientific Advisory  
19 Committee of Avelo Ltd.

## 20 21 22 **KEYWORDS**

23  
24 Tuberculosis, COVID-19, Diagnostics, Point-of-care, Innovation

## 25 26 **WORD COUNT**

27  
28 2852

## 29 30 **REFERENCES**

- 31  
32 1. Global Tuberculosis Report 2021. <https://www.who.int/publications-detail-redirect/9789240037021> (2021).
- 33  
34 2. Reid, M. J. A. *et al.* Building a tuberculosis-free world: The Lancet Commission on  
35 tuberculosis. *The Lancet* vol. 393 1331–1384 (2019).
- 36  
37 3. Vesga, J. F. *et al.* Assessing tuberculosis control priorities in high-burden settings: a modelling  
38 approach. *The Lancet Global Health* vol. 7 e585–e595 (2019).
- 39  
40 4. Chin, D. P. & Hanson, C. L. Finding the Missing Tuberculosis Patients. *The Journal of infectious*  
41 *diseases* vol. 216 S675–S678 (2017).
- 42  
43 5. Nathavitharana, R. R., Jijon, D. F., Pal, P. & Rane, S. Diagnosing active tuberculosis in primary  
44 care. *BMJ* **374**, n1590 (2021).
- 45  
46 6. WHO consolidated guidelines on tuberculosis. Module 3: Diagnosis - Rapid diagnostics for  
47 tuberculosis detection 2021 update. <https://www.who.int/publications-detail-redirect/9789240029415> (2021).
- 48  
49 7. Steingart, K. R. *et al.* Fluorescence versus conventional sputum smear microscopy for  
50 tuberculosis: a systematic review. *Lancet Infect. Dis.* **6**, 570–581 (2006).
- 51  
52 8. WHO High-priority target product profiles for new tuberculosis diagnostics.  
53 [http://www.who.int/tb/publications/tpp\\_report/en/](http://www.who.int/tb/publications/tpp_report/en/) (2014).
- 54  
55 9. Chopra, K. K. & Singh, S. Tuberculosis: Newer diagnostic tests: Applications and limitations.  
56 *Indian J. Tuberc.* **67**, S86–S90 (2020).
- 57  
58  
59  
60



10. Naidoo, K. & Dookie, N. Can the GeneXpert MTB/XDR deliver on the promise of expanded, near-patient tuberculosis drug-susceptibility testing? *Lancet Infect. Dis.* **0**, (2022).
11. Penn-Nicholson, A. *et al.* A prospective multicentre diagnostic accuracy study for the Truenat tuberculosis assays. *Eur. Respir. J.* (2021) doi:10.1183/13993003.00526-2021.
12. Branigan, D. *et al.* The Tuberculosis Diagnostics Pipeline Report: Advancing the Next Generation of Tools. 24 (2020).
13. Lateral flow urine lipoarabinomannan assay (LF-LAM) for the diagnosis of active tuberculosis in people living with HIV, 2019 Update. <https://www.who.int/publications-detail-redirect/9789241550604>.
14. Yin, X. *et al.* Diagnostic value of Lipoarabinomannan antigen for detecting *Mycobacterium tuberculosis* in adults and children with or without HIV infection. *J. Clin. Lab. Anal.* **n/a**, e24238.
15. Broger, T. *et al.* Diagnostic accuracy of 3 urine lipoarabinomannan tuberculosis assays in HIV-negative outpatients. *J. Clin. Invest.* **130**, 5756–5764 (2020).
16. Shamseer, L. *et al.* Preferred reporting items for systematic review and meta-analysis protocols (PRISMA-P) 2015: elaboration and explanation. *BMJ* **349**, g7647 (2015).
17. Levac, D., Colquhoun, H. & O'Brien, K. K. Scoping studies: advancing the methodology. *Implement. Sci.* **5**, 69 (2010).
18. C. Tricco, A. *et al.* PRISMA Extension for Scoping Reviews (PRISMA-ScR): Checklist and Explanation. *Ann. Intern. Med.* (2018) doi:10.7326/M18-0850.
19. The selection and use of essential in vitro diagnostics - TRS 1031. <https://www.who.int/publications-detail-redirect/9789240019102>.
20. World Health Organization. *In vitro diagnostic medical devices (IVDs) used for the detection of high-risk human papillomavirus (HPV) genotypes in cervical cancer screening.* (World Health Organization, 2018).
21. Dinnes, J. *et al.* Rapid, point-of-care antigen and molecular-based tests for diagnosis of SARS-CoV-2 infection. *Cochrane Database Syst. Rev.* **2020**, CD013705 (2020).
22. Pai, N. P., Vadnais, C., Denking, C., Engel, N. & Pai, M. Point-of-care testing for infectious diseases: diversity, complexity, and barriers in low- and middle-income countries. *PLoS Med* **9**, e1001306 (2012).

## Preferred Reporting Items for Systematic reviews and Meta-Analyses extension for Scoping Reviews (PRISMA-ScR) Checklist

| SECTION                                               | ITEM | PRISMA-ScR CHECKLIST ITEM                                                                                                                                                                                                                                                                                  | REPORTED ON PAGE # |
|-------------------------------------------------------|------|------------------------------------------------------------------------------------------------------------------------------------------------------------------------------------------------------------------------------------------------------------------------------------------------------------|--------------------|
| <b>TITLE</b>                                          |      |                                                                                                                                                                                                                                                                                                            |                    |
| Title                                                 | 1    | Identify the report as a scoping review.                                                                                                                                                                                                                                                                   | 1                  |
| <b>ABSTRACT</b>                                       |      |                                                                                                                                                                                                                                                                                                            |                    |
| Structured summary                                    | 2    | Provide a structured summary that includes (as applicable): background, objectives, eligibility criteria, sources of evidence, charting methods, results, and conclusions that relate to the review questions and objectives.                                                                              | 1-2                |
| <b>INTRODUCTION</b>                                   |      |                                                                                                                                                                                                                                                                                                            |                    |
| Rationale                                             | 3    | Describe the rationale for the review in the context of what is already known. Explain why the review questions/objectives lend themselves to a scoping review approach.                                                                                                                                   | 2                  |
| Objectives                                            | 4    | Provide an explicit statement of the questions and objectives being addressed with reference to their key elements (e.g., population or participants, concepts, and context) or other relevant key elements used to conceptualize the review questions and/or objectives.                                  | 3                  |
| <b>METHODS</b>                                        |      |                                                                                                                                                                                                                                                                                                            |                    |
| Protocol and registration                             | 5    | Indicate whether a review protocol exists; state if and where it can be accessed (e.g., a Web address); and if available, provide registration information, including the registration number.                                                                                                             | N/A                |
| Eligibility criteria                                  | 6    | Specify characteristics of the sources of evidence used as eligibility criteria (e.g., years considered, language, and publication status), and provide a rationale.                                                                                                                                       | 4                  |
| Information sources*                                  | 7    | Describe all information sources in the search (e.g., databases with dates of coverage and contact with authors to identify additional sources), as well as the date the most recent search was executed.                                                                                                  | 4-5                |
| Search                                                | 8    | Present the full electronic search strategy for at least 1 database, including any limits used, such that it could be repeated.                                                                                                                                                                            | 5-7                |
| Selection of sources of evidence†                     | 9    | State the process for selecting sources of evidence (i.e., screening and eligibility) included in the scoping review.                                                                                                                                                                                      | 7                  |
| Data charting process‡                                | 10   | Describe the methods of charting data from the included sources of evidence (e.g., calibrated forms or forms that have been tested by the team before their use, and whether data charting was done independently or in duplicate) and any processes for obtaining and confirming data from investigators. | 7                  |
| Data items                                            | 11   | List and define all variables for which data were sought and any assumptions and simplifications made.                                                                                                                                                                                                     | 7                  |
| Critical appraisal of individual sources of evidence§ | 12   | If done, provide a rationale for conducting a critical appraisal of included sources of evidence; describe the methods used and how this information was used in any data synthesis (if appropriate).                                                                                                      | 7 (N/A)            |
| Synthesis of results                                  | 13   | Describe the methods of handling and summarizing the data that were charted.                                                                                                                                                                                                                               | 7/8                |

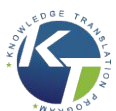

| SECTION                                       | ITEM | PRISMA-ScR CHECKLIST ITEM                                                                                                                                                                       | REPORTED ON PAGE # |
|-----------------------------------------------|------|-------------------------------------------------------------------------------------------------------------------------------------------------------------------------------------------------|--------------------|
| <b>RESULTS</b>                                |      |                                                                                                                                                                                                 |                    |
| Selection of sources of evidence              | 14   | Give numbers of sources of evidence screened, assessed for eligibility, and included in the review, with reasons for exclusions at each stage, ideally using a flow diagram.                    | N/A                |
| Characteristics of sources of evidence        | 15   | For each source of evidence, present characteristics for which data were charted and provide the citations.                                                                                     | N/A                |
| Critical appraisal within sources of evidence | 16   | If done, present data on critical appraisal of included sources of evidence (see item 12).                                                                                                      | N/A                |
| Results of individual sources of evidence     | 17   | For each included source of evidence, present the relevant data that were charted that relate to the review questions and objectives.                                                           | N/A                |
| Synthesis of results                          | 18   | Summarize and/or present the charting results as they relate to the review questions and objectives.                                                                                            | N/A                |
| Summary of evidence                           | 19   | Summarize the main results (including an overview of concepts, themes, and types of evidence available), link to the review questions and objectives, and consider the relevance to key groups. | N/A                |
| Limitations                                   | 20   | Discuss the limitations of the scoping review process.                                                                                                                                          | 8                  |
| Conclusions                                   | 21   | Provide a general interpretation of the results with respect to the review questions and objectives, as well as potential implications and/or next steps.                                       | N/A                |
| Funding                                       | 22   | Describe sources of funding for the included sources of evidence, as well as sources of funding for the scoping review. Describe the role of the funders of the scoping review.                 | 8                  |

JBI = Joanna Briggs Institute; PRISMA-ScR = Preferred Reporting Items for Systematic reviews and Meta-Analyses extension for Scoping Reviews.

\* Where *sources of evidence* (see second footnote) are compiled from, such as bibliographic databases, social media platforms, and Web sites.

† A more inclusive/heterogeneous term used to account for the different types of evidence or data sources (e.g., quantitative and/or qualitative research, expert opinion, and policy documents) that may be eligible in a scoping review as opposed to only studies. This is not to be confused with *information sources* (see first footnote).

‡ The frameworks by Arksey and O'Malley (6) and Levac and colleagues (7) and the JBI guidance (4, 5) refer to the process of data extraction in a scoping review as data charting.

§ The process of systematically examining research evidence to assess its validity, results, and relevance before using it to inform a decision. This term is used for items 12 and 19 instead of "risk of bias" (which is more applicable to systematic reviews of interventions) to include and acknowledge the various sources of evidence that may be used in a scoping review (e.g., quantitative and/or qualitative research, expert opinion, and policy document).

From: Tricco AC, Lillie E, Zarin W, O'Brien KK, Colquhoun H, Levac D, et al. PRISMA Extension for Scoping Reviews (PRISMA-ScR): Checklist and Explanation. *Ann Intern Med.* 2018;169:467–473. doi: 10.7326/M18-0850.

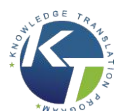

Supplement: bmjopen-2022-065194.draft_revisions.pdf [file bmjopen-2022-065194.draft_revisions.pdf]
